# Supplementary material for: Process Evaluation of Lumbar Interbody Fusion Surgeries in Five Dutch Hospitals: A Qualitative Analysis
Source: MDPI journal article supplement (doi:10.3390/medicina58010099), 2022-01-09
Supplement: s1 [file s1]

## Additional File S1 – Interview Guides

### Checklist Physician Assistant/Specialized Nurse:

- **Preoperative:**
  - Which type of patients are seen in the outpatient clinic?
    - Spondylodesis?
    - How many visits to outpatient clinic?
  - Who refers the patients to you?
  - How do you evaluate the transfer of medical information?
  - What information do you provide the patients?
    - Preoperative
      - What is the added value in comparison with consultations by a surgeon?
    - Process of hospitalization
    - Postoperative
  - Are informal caregivers and/or family involved?
  - Use of patient reported questionnaires in outpatient clinic?
  - Use of educational material?
    - Flyers
    - Websites
  - Do you see all patients who receive spodylodesis?
  - Do you get feedback form patients on this consultation?
  - What are common preoperative problems for patients?
    - How are these problems solved?
  - Do you also provide this extra care for other types of surgery?
  - Are there other things you arrange for?
    - Logistic problem solving?
  - Do you have any suggestion for improvement in the preoperative trajectory?
- **Surgery:**
  - Are patients hospitalized one day prior to surgery?
    - Patients' experiences?
    - Do you have any specific tasks during surgery?
  - Tasks on day of surgery?
  - Do you speak with informal caregivers during first hospitalization and surgery?
- **Hospitalization:**
  - What are common peri-hospitalization problems for patients?
    - Are there ways to solve these problems?
  - Tasks during hospitalization?
    - Do you assist/function as the ward physician?
    - Arrangements of post-hospitalization care?
      - Do you visit hospitalized patiens after surgery?
      - Do you arrange homecare if necessary?
  - Do you have any suggestion for improvement in the peri-hospitalization trajectory?

- **Post-hospitalization:**

- Do you see patients in the outpatient clinic after surgery?
  - Wound assessment?
  - Other assessments?
  - How many times do you see patients in the outpatient clinic after surgery?
  - In which cases do you consult the surgeon or supervisor?
  - Is patients have question in between visits, who can they contact?
- Frequently asked questions by patients?
  - How can we overcome/answer these questions?
- What information do you provide the patients post-hospitalization?
  - Frigmin
  - Physical therapy
  - Exercise
  - Sutures
  - Pain medication
  - Homecare
- Use of patient reported questionnaires in outpatient clinic?
- Do you have any suggestion for improvement in the post-hospitalization trajectory?
- Do informal caregivers play a significant role in the postoperative care? Do we underestimate the amount of help informal caregivers provide?
- Do patients report on common problems?
  - Subsequent to surgery
  - Long term
  - Possible solutions?
- Do you have any suggestion for improvement in the post-hospitalization trajectory?

**Checklist patients:**

- **Preoperative:**

- Visits to outpatient clinic before surgery:

- How many visits?
  - Transfer of medical information
  - Waiting time
- What information did you receive?
  - Different treatment options
  - Complications
  - Expected period of recovery
  - Expectations regarding treatment (leg pain vs. backpain)
  - Was the surgical intervention clearly explained?
    - What will be done?
    - How long will the surgery take?
    - General anesthesia
    - Pain medication with morphine pump or oral medication
- Use of educational material
  - Flyer
  - Websites

- Were all consultations useful?
- Did you remember the important information?
  - Were difficult terms used, was everything explained in an understandable fashion?
- Were there enough opportunities to ask questions?
- Do you have any suggestion for improvement in the pre-hospitalization trajectory?
- **Surgery:**
  - General remarks about day of surgery?
    - How did you experience the admission to the ward?
    - How were you prepared for surgery?
    - How did you experience the transfer to the holding?
    - How did you experience the preparations for anesthesia?
    - How did you experience the interaction in the operating room prior to surgery?
      - Accompaniment
      - Medical information transfer
      - Identification of patient
      - Was it clear why everyone was there and what everyone's role was during surgery?
  - Positive/negative experiences?
  - Do you have any suggestion for improvement?
- **Hospitalization:**
  - How long did you have to stay hospitalized?
  - Experiences?
    - Which doctors did you see during hospitalization?
      - Ward doctor, surgeon?
      - Responsible surgeon(s)?
    - Experience with different doctors
    - Was it clear to you what role each healthcare professional had?
  - Go through protocol:
    - Wound examination
    - Physical therapy (Day after surgery, climbing stairs, educational material about physical therapy)
    - Pain medication (pump, sufficient, pain management, tapering off medication)
    - Fragmin (6 weeks?)
    - X-ray of the lumbar spine during hospitalization?
    - Corset?
  - Information about post-hospitalization trajectory and homecare arranged if necessary?
    - Fragmin
    - Physical therapy
    - Exercise
    - Sutures
    - Pain medication

- Homecare
  - Medical rehabilitation
- Did you remember the important information?
  - Were difficult terms used, was everything explained in an understandable fashion?
- Were there enough opportunities to ask questions?
- Do you have any suggestion for improvement during hospitalization?
- **Post-hospitalization:**
  - What were the first days at home?
  - Did you need any help?
    - Medication (Pain medication, fragmin).
    - Physical therapy
    - Homecare
    - Medical rehabilitation
    - Sufficient care?
  - Setting goals and achieving them (what were the biggest obstacles or barriers)
    - Did you recover as you expected?
  - How many times do you visit the outpatient clinic after surgery?
    - Wound examinations?
    - Visits with the responsible surgeon
      - Recovery
      - Goals and difficulties
      - X-ray
      - Follow-up appointments
  - Useful?
  - Did you remember the important information?
    - Were difficult terms used, was everything explained in an understandable fashion?
  - Do you have any suggestion for improvement during hospitalization?
  - Do you think outpatient visits 6 and 12 months after surgery are useful?

### **Checklist informal caregivers:**

- **Preoperative:**
  - Visits to outpatient clinic before surgery
  - Were you present at all appointments?
  - What are your experiences?
  - What information did you receive?
    - Different treatment options
    - Complications
    - Expected period of recovery
    - Expectations regarding treatment (leg pain vs. backpain)
    - Was the surgical intervention clearly explained?
      - What will be done?

- How long will the surgery take?
  - General anesthesia
  - Pain medication with morphine pump or oral medication
- Were all consultations useful?
- Did you remember the important information?
  - Were difficult terms used, was everything explained in an understandable fashion?
- Were there enough opportunities to ask questions?
- Do you have any suggestion for improvement in the pre-hospitalization trajectory?
- **Surgery:**
  - Were you informed about the surgery?
    - Communication
  - How did you experience the day of surgery?
    - Which services were provided?
    - Were you informed about services you could use?
  - Do you have any suggestion for improvement?
- **Hospitalization:**
  - Experiences?
    - Which doctors did you see during hospitalization?
      - Ward doctor, surgeon?
      - Responsible surgeon(s)?
    - Experience with different doctors
    - Was it clear to you what role each healthcare professional had?
  - Did you receive information about the post-operative care?
    - Were you involved in the postoperative care?
  - Useful services for informal caregivers?
    - Were you informed about services you could use?
    - What went well?
    - What would have been useful?
  - Do you have any suggestion for improvement?
- **Post- hospitalization:**
  - Did you have a significant role during recovery?
  - Did you receive enough support/help with providing care (e.g. fragmin)?
  - Do we underestimate the amount of help informal caregivers provide?
  - Were you present at postoperative outpatient clinic visits?
  - Experiences?
  - Useful?
  - Did you remember the important information?
    - Were difficult terms used, was everything explained in an understandable fashion?
  - Were there enough opportunities to ask questions?
  - Do you have any suggestion for improvement in the post-hospitalization trajectory?
  - Do you think outpatient visits 6 and 12 months after surgery are useful?

## Checklist surgeons:

### - **Preoperative:**

- How many times do you see a patient before surgery?
- How much time do you have every visit?
- What information did you give the patients?
  - Different treatment options
  - Complications
  - Expected period of recovery
  - Expectations regarding treatment (leg pain vs. backpain)
- Patient reported questionnaires in outpatient clinic?
  - Do you use them?
  - Are they useful?
  - Do you have questionnaires on the pain experience?
- Use of educational material?
  - Flyers
  - Websites
- Are all visits useful?
- Do you have any suggestion for improvement in the pre-hospitalization trajectory?

### - **Surgery:**

- Preference for TLIF or PLIF?\*
- Why?
- Would you consider choosing the most cost-effective alternative?\*
- Why?
- How do you plan surgeries? How do you optimize the process and use time effectively?
  - Do you perform the surgery alone or with two surgeons (neurosurgeon/orthopedic surgeon)?
    - Room for improvement?
  - Time schedule of surgery, including anesthetist and radiology
    - How long does the surgery take?
    - How do you manage these types of surgery?
    - Room for improvement?
  - Radiology
    - Which system is used?
    - When is radiology performed? How long does it take?
    - How do you manage the imaging?
    - Room for improvement?
  - Door movement?
    - Strict policy
    - Room for improvement?

### - **(Post) Hospitalization:**

- How many times and at what interval do you want patients to visit the outpatient clinic after surgery?
  - Wound examinations?

- How is this interval chosen?
  - Is this recorded in protocols?
  - Do you use (radiographic) imaging? When and why?
- Visits 1- and 2-year post-operative?
  - Why or why not??
  - Useful?
- Questionnaires
  - Useful?
  - How do you use the outcomes?
- How is the post-hospitalization care arranged?
  - Do you visit the hospitalized patient after surgery?
  - Which types of additional care are needed (e.g. physical therapy)?
- Do you have any suggestion for improvement in the (post)hospitalization trajectory?

\* Study-specific questions. Fragments regarding these questions are not relevant nor useful for the process evaluation of lumbar interbody fusion surgery, and were therefore not included in this study.
