# Supplementary material for: Process Evaluation of Lumbar Interbody Fusion Surgeries in Five Dutch Hospitals: A Qualitative Analysis
Source: MDPI journal article supplement (doi:10.3390/medicina58010099), 2022-01-09
Supplement: s1 [file s1]

## Tables S1 & S2 – Limiting and promoting factors

*Table S1 - Discussed promoting factors during interviews with patients, ICGs or healthcare providers.*

| <i>Promoting factor</i>                                                 | <i>Patients</i> | <i>Informal caregivers</i> | <i>Healthcare professionals</i> |
|-------------------------------------------------------------------------|-----------------|----------------------------|---------------------------------|
| Information and opportunities to ask question during consultations      | X               | X                          | X                               |
| Multidisciplinary consultations                                         | X               | X                          | X                               |
| Being accompanied by an informal caregiver to consultations             | X               | X                          |                                 |
| Management of expectations                                              | X               |                            | X                               |
| Good communication and guidance during hospitalisation                  | X               | X                          | X                               |
| Mobilization with support of a physical therapist subsequent to surgery | X               |                            | X                               |
| Post-operative X-ray for later comparison                               | X               |                            | X                               |
| Check-up appointments                                                   | X               | X                          | X                               |
| No unnecessary check-ups after one or two years                         | X               |                            | X                               |
| General satisfaction during the process                                 | X               | X                          | X                               |

X = Statement(s) made in compliance with mentioned factor.

Table S2 - Discussed limiting factors during interviews with patients, ICGs or healthcare providers.

| Limiting factor                                                                     | Patients | Informal caregivers | Healthcare professionals |
|-------------------------------------------------------------------------------------|----------|---------------------|--------------------------|
| Lack of educational material                                                        | X        | X                   | X                        |
| Long history of complaints and failed conservative treatments                       | X        |                     | X                        |
| Long waiting times                                                                  | X        |                     | X                        |
| Lack of use of pre-operative PROMs                                                  |          |                     | X                        |
| Lack of guidance and communication prior to, during and after hospitalisation       | X        | X                   | X                        |
| Lack of dedicated spine-surgery team on the operation room                          |          |                     | X                        |
| Lack of standardised pain protocols                                                 |          |                     | X                        |
| Limited or delayed involvement of the general practitioner after hospital discharge | X        | X                   |                          |
| Lack of information on tapering off opioids                                         | X        | X                   |                          |

X = Statement(s) made in compliance with mentioned factor.
