# Supplementary material for: Process Evaluation of Lumbar Interbody Fusion Surgeries in Five Dutch Hospitals: A Qualitative Analysis
Source: MDPI journal article supplement (doi:10.3390/medicina58010099), 2022-01-09
Supplement: s1 [file s1]

**LIFT-Study Group Collaborators**

**1. Zuyderland Medical Centre, Heerlen**

H. Van Santbrink, MD, PhD<sup>1,2,4</sup>

**2. Maastricht UMC+**

M.P. Ter Laak, MD, PhD<sup>4</sup>

**3. Radboud UMC & Canisius, Nijmegen**

R.H.M.A. Bartels, MD, PhD<sup>7</sup>

**4. UMC Groningen**

J.M.A. Kuijlen, MD, PhD<sup>8</sup>

**5. VieCuri Medical Centre, Venlo**

M.H.H.M. Hulsbosch, MD<sup>9</sup>
