# Supplementary figures and images for: Process Evaluation of Lumbar Interbody Fusion Surgeries in Five Dutch Hospitals: A Qualitative Analysis
Source: MDPI journal article supplement (doi:10.3390/medicina58010099), 2022-01-09

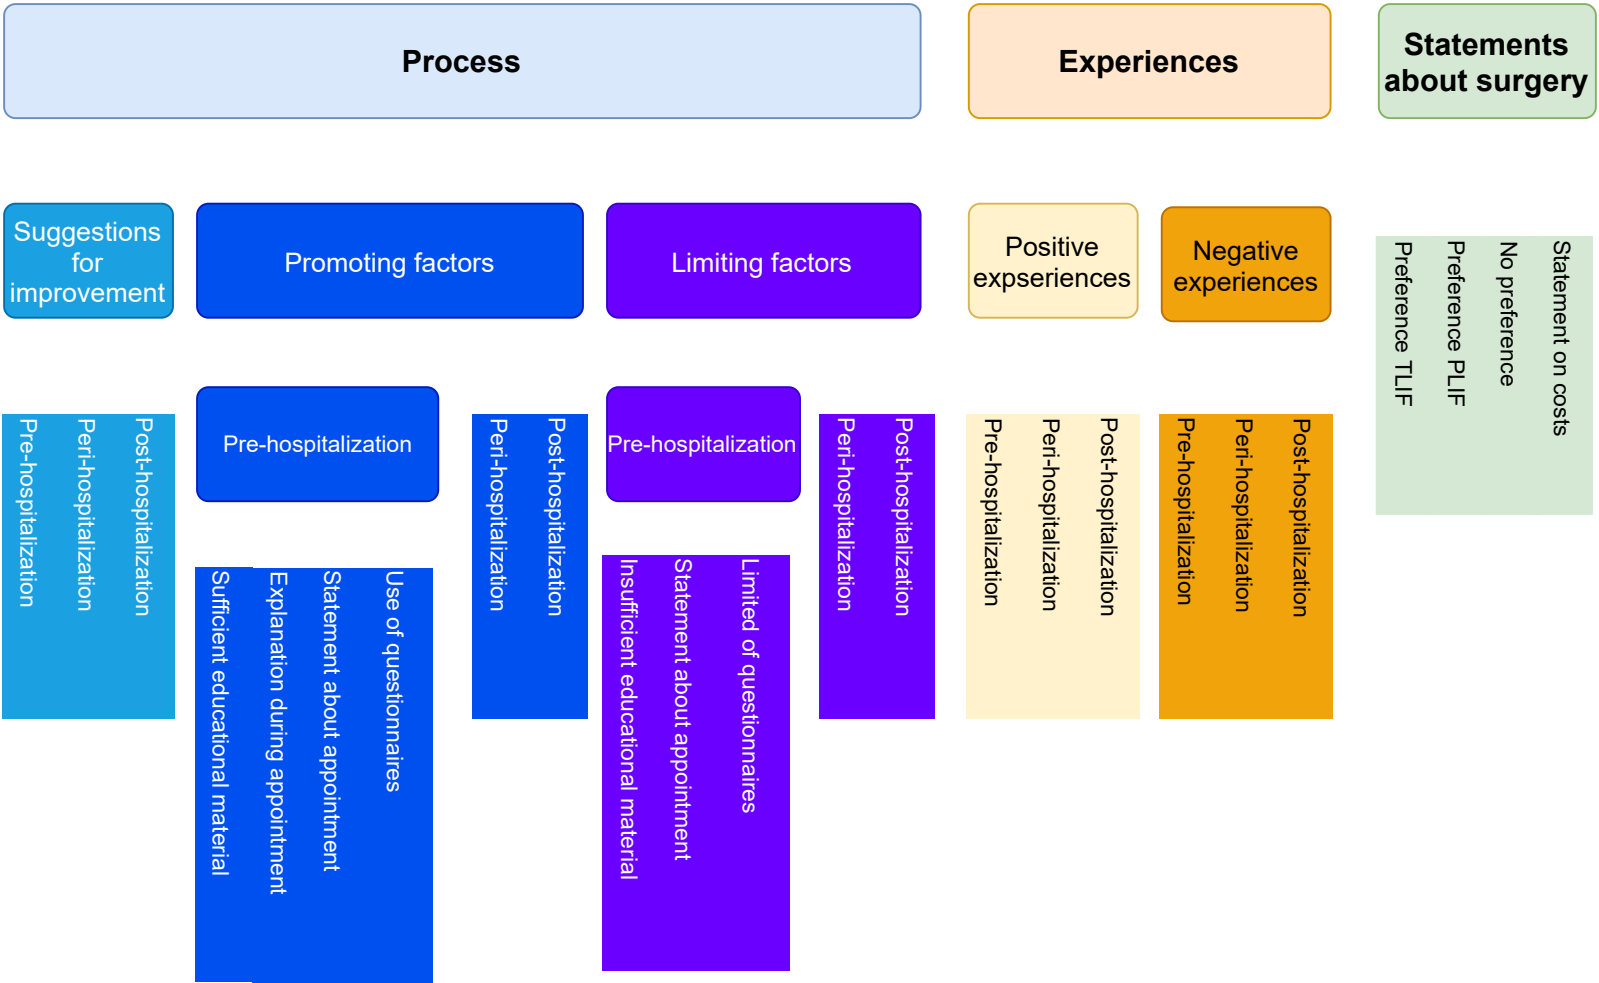

Supplement: s1 [file s1]
